# Supplementary material
Source: PubMed Central journal article supplement (PMC10313755)
Supplement: NIHMS1884462-supplement-supinfo.pdf [file NIHMS1884462-supplement-supinfo.pdf]

## Caution: Merging Ion Channel Traffic Ahead

Brian P Delisle and Don E Burgess

DOI: 10.1113/JP284497

Corresponding author(s): Brian Delisle ([brian.delisle@uky.edu](mailto:brian.delisle@uky.edu))

*The referees have opted to remain anonymous.*

---

### Review Timeline:

|                     |             |
|---------------------|-------------|
| Submission Date:    | 28-Feb-2023 |
| Editorial Decision: | 06-Mar-2023 |
| Revision Received:  | 07-Mar-2023 |
| Accepted:           | 08-Mar-2023 |

---

Senior Editor: Natalia Trayanova

Reviewing Editor: Eleonora Grandi

### Transaction Report:

(Note: With the exception of the correction of typographical or spelling errors that could be a source of ambiguity, letters and reports are not edited. Depending on transfer agreements, referee reports obtained elsewhere may or may not be included in this compilation. Referee reports are anonymous unless the Referee chooses to sign their reports.)

Dear Brian,

Re: JP-P-2023-284497 "Caution: Merging Ion Channel Traffic Ahead" by Brian P Delisle and Don E Burgess

Thank you for submitting your manuscript to The Journal of Physiology. It has been assessed by a Reviewing Editor and by 1 expert referee and we are pleased to tell you that it is acceptable for publication following minor revision.

Please advise your co-authors of this decision as soon as possible.

The referee reports are copied at the end of this email.

Please address all the points raised and incorporate all requested revisions or explain in your Response to Referees why a change has not been made. We hope you will find the comments helpful and that you will be able to return your revised manuscript within 2 weeks. If you require longer than this, please contact journal staff: [jp@physoc.org](mailto:jp@physoc.org).

Your revised manuscript should be submitted online using the link in your Author Tasks: Link Not Available. This link is accessible via your account as Corresponding Author; it is not available to your co-authors. If this presents a problem, please contact journal staff ([jp@physoc.org](mailto:jp@physoc.org)). Image files from the previous version are retained on the system. Please ensure you replace or remove any files that are being revised.

If you do not wish to submit a revised version of your manuscript, you must inform our journal staff ([jp@physoc.org](mailto:jp@physoc.org)) or reply to this email to request withdrawal. Please note that a manuscript must be formally withdrawn from the peer review process at one journal before it may be submitted to another journal.

**TRANSPARENT PEER REVIEW POLICY:** To improve the transparency of its peer review process, The Journal of Physiology publishes online (as supporting information) the peer review history of all articles accepted for publication. Readers will have access to decision letters, including Editors' comments and referee reports, for each version of the manuscript, as well as any author responses to peer review comments. Referees can decide whether or not they wish to be named on the peer review history document.

**LANGUAGE EDITING AND SUPPORT FOR PUBLICATION:** If you would like help with English language editing, or other article preparation support, Wiley Editing Services offers expert help, including English Language Editing, as well as translation, manuscript formatting, and figure formatting at [www.wileyauthors.com/eeo/preparation](http://www.wileyauthors.com/eeo/preparation). You can also find resources for Preparing Your Article for general guidance about writing and preparing your manuscript at [www.wileyauthors.com/eeo/prepresources](http://www.wileyauthors.com/eeo/prepresources).

**REVISION CHECKLIST:**

Upload a full Response to Referees file. To create your 'Response to Referees' copy all the reports, including any comments from the Senior and Reviewing Editors, into a Microsoft Word, or similar, file and respond to each point, using font or background colour to distinguish comments and responses and upload as the required file type.

Please upload two versions of your manuscript text: one with all relevant changes highlighted and one clean version with no changes tracked. The manuscript file should include all tables and figure legends, but each figure/graph should be uploaded as separate, high-resolution files.

You may also upload:

- 'Potential Cover Art' for consideration as the issue's cover image.
- Appropriate Supporting Information (Video, audio or data set: see [https://jp.msubmit.net/cgi-bin/main.plex?form\\_type=display\\_requirements#supp](https://jp.msubmit.net/cgi-bin/main.plex?form_type=display_requirements#supp)).

We look forward to receiving your revised submission.

If you have any queries, please reply to this email and we will be pleased to advise.

Best wishes

Natalia Trayanova  
Senior Editor  
The Journal of Physiology

-----  
EDITOR COMMENTS

Reviewing Editor:

Thank you for a nice commentary. There are a few suggestions from the reviewer that the authors are invited to consider and incorporate in the revision at their discretion.

-----

## REFeree COMMENTS

Referee #1:

We thank the authors first and foremost for their constructive comments and excellent suggestions during the review process, which have greatly improved our manuscript. We are honoured to have our work highlighted in this perspective article.

We read the perspective with great interest and appreciate the detailed and very clear explanation of our modelling methodology, which may make the work easier to understand to the diverse readership of the Journal of Physiology.

We did not find any major factual inaccuracies in the perspective article, although it might be relevant to note that we used both stochastic single-channel simulations (when comparing to results investigating single-channel properties such as recycling rates) and equivalent deterministic models for all whole-cell simulations. The exact same model structure and parameters can be used for both approaches, which produce the same results for a sufficiently large number of channels, but the deterministic implementation is significantly more computationally efficient.

Finally, we were wondering whether the perspective should not also briefly mention that in fact all ion channels are regulated by dynamic trafficking processes, which are modulated by various physiological factors and numerous drugs, and may constitute novel therapeutic targets, as the authors have themselves investigated in the past. In general, such a broader perspective about potential future implications of the concepts addressed in our manuscript would likely be of particular interest to readers of the journal (perhaps even more so than the theoretical details of our methods).



## Response to the editor and referee:

Reviewing Editor:

Thank you for a nice commentary. There are a few suggestions from the reviewer that the authors are invited to consider and incorporate in the revision at their discretion.

*Thank you for the kind note. We have incorporated the referee's suggested changes in the revised document.*

## REFEREE COMMENTS

Referee #1:

We did not find any major factual inaccuracies in the perspective article, although it might be relevant to note that we used both stochastic single-channel simulations (when comparing to results investigating single-channel properties such as recycling rates) and equivalent deterministic models for all whole-cell simulations. The exact same model structure and parameters can be used for both approaches, which produce the same results for a sufficiently large number of channels, but the deterministic implementation is significantly more computationally efficient.

*Thank you for this comment. We hope we made this point clearer on P4.*

*"Meier and colleagues use stochastic simulations to determine the rate constants for Kv11.1 channels by optimizing agreement with experimental results for Kv11.1 channel trafficking. Since they can use the same model structure for deterministic simulations, they are able to integrate the model with a Markovian model of  $I_{Kr}$  and the ORd AP model."*

Finally, we were wondering whether the perspective should not also briefly mention that in fact all ion channels are regulated by dynamic trafficking processes, which are modulated by various physiological factors and numerous drugs, and may constitute novel therapeutic targets, as the authors have themselves investigated in the past. In general, such a broader perspective about potential future implications of the concepts addressed in our manuscript would likely be of particular interest to readers of the journal (perhaps even more so than the theoretical details of our methods).

*Thank you for suggestion. We worked make this point clearer. We modified the text on P5.*

*"A strength and limitation are the model's simplicity and its sole focus on Kv11.1 channels. All the cardiac ion channels are regulated by dynamic cytoplasmic processes, which are also modulated by various physiological factors (temperature, ionic conditions, and drugs). These limitations reflect the need for more experimental data on the cytoplasmic processes that regulate the trafficking of Kv11.1 and the other cardiac ion channels."*

Dear Brian,

Re: JP-P-2023-284497R1 "Caution: Merging Ion Channel Traffic Ahead" by Brian P Delisle and Don E Burgess

Thank you for a nice perspective!

We are pleased to tell you that it has been accepted for publication in The Journal of Physiology.

**TRANSPARENT PEER REVIEW POLICY:** To improve the transparency of its peer review process, The Journal of Physiology publishes online (as supporting information) the peer review history of all articles accepted for publication. Readers will have access to decision letters, including Editors' comments and referee reports, for each version of the manuscript, as well as any author responses to peer review comments. Referees can decide whether or not they wish to be named on the peer review history document.

The last Word (or similar) version of the manuscript provided will be used by the Production Editor to prepare your proof. When this is ready you will receive an email containing a link to Wiley's Online Proofing System. The proof should be thoroughly checked and corrected as promptly as possible.

Authors should note that it is too late at this point to offer corrections prior to proofing. The accepted version will be published online, ahead of the copy edited and typeset version being made available. Major corrections at proof stage, such as changes to figures, will be referred to the Editors for approval before they can be incorporated. Only minor changes, such as to style and consistency, should be made at proof stage. Changes that need to be made after proof stage will usually require a formal correction notice.

All queries at proof stage should be sent to: TJP@wiley.com.

Are you on Twitter? Once your paper is online, why not share your achievement with your followers? Please tag The Journal (@jphysiol) in any tweets and we will share your accepted paper with our 30,000 followers!

Best wishes,

Natalia Trayanova  
Senior Editor  
The Journal of Physiology

P.S. - You can help your research get the attention it deserves! Check out Wiley's free Promotion Guide for best-practice recommendations for promoting your work at [www.wileyauthors.com/eoo/guide](http://www.wileyauthors.com/eoo/guide). You can learn more about Wiley Editing Services which offers professional video, design, and writing services to create shareable video abstracts, infographics, conference posters, lay summaries, and research news stories for your research at [www.wileyauthors.com/eoo/promotion](http://www.wileyauthors.com/eoo/promotion).

**IMPORTANT NOTICE ABOUT OPEN ACCESS:** To assist authors whose funding agencies mandate public access to published research findings sooner than 12 months after publication, The Journal of Physiology allows authors to pay an Open Access (OA) fee to have their papers made freely available immediately on publication.

The Corresponding Author will receive an email from Wiley with details on how to register or log-in to Wiley Authors Services where you will be able to place an order.

You can check if your funder or institution has a Wiley Open Access Account here: <https://authorservices.wiley.com/author-resources/Journal-Authors/licensing-and-open-access/open-access/author-compliance-tool.html>.

-----

Reviewing Editor Comments:

Thank you for a nice perspective!
